# Supplementary material for: Understanding Clean-Energy Supply Chains: A US Perspective
Source: Research Square preprint supplement (doi:10.21203/rs.3.rs-5332308/v1), 2024-10-31
Supplement: Supplementary file 1 [file 0397250b4ba391bb5ca65364.xlsx]

## Sheet: Table 1
Table 1-1 The 2022 Final List of Critical Minerals published February 24, 2022, by the U.S. Geological Survey (87 FR 10381).			Table 1-2 The 2023 DOE Critical Materials List
Critical Mineral	Applications		Material	On the USGS List?	On the Draft DOE List?	On the Final DOE List?	Number of Comments Received	Summary of Comment(s)	DOE Action
Aluminum	Metallurgy and many sectors of the economy.		Aluminum	Yes	Yes	Yes	5	Aluminum score should increase in short-term and medium-term due to supply risk (low producer diversity – China) and importance to energy (more end- uses than considered in assessment).	No action: Aluminum is already on the USGS and DOE lists. DOE may consider this input for future assessments and activities.
Antimony	Flame retardants and lead-acid batteries.		Antimony	Yes	No	No	2	Antimony should be on the list. Antimony compounds used in electronics and for fire-retardance.	No action: Antimony is already on the USGS list and no substantial data or information were provided.
Arsenic	Pesticides and semiconductors.		Beryllium	Yes	No	No	1	Beryllium should be on the list— important for solar photovoltaics (PV), nuclear, electric vehicle (EV) batteries. Data NOT provided. Most beryllium is imported from Kazakhstan.	No action: Beryllium is already on the USGS list and no data were provided.
Barite	Hydrocarbon production.		Boron	No	No	No	8	Boron should be on the list and is used in more end-uses than Neodymium Iron Boron magnets (wind turbine blades, boron-doped photovoltaics, battery coatings). There is increased international demand for boron.	DOE revisited the assessment of boron. DOE is not aware of any substantiated data that quantifies the use of boron in electric glass for wind turbine blades or that the use of boron in these end-use applications is driving significant increase in demand for boron.
Beryllium	Aerospace and defense.		Bromine	No	No	No	1	Bromine should be considered for the list—important to zinc bromide batteries.	No action: Zinc bromide batteries are currently an emerging battery technology with uncertainty in future deployment.
Bismuth	Medical, metallurgy, and atomic research.		Butyllithium	No	No	No	1	Butyllithium should be on the list—important for manufacturing of “green” tires and lightweight automotive interior.	No action: The scope of materials for this assessment does not include materials that are used indirectly in the manufacturing process but do not contribute to the composition of the components or final products. DOE may consider this input for future assessments and activities.
Cerium	Catalytic converters, ceramics, glass, metallurgy, and polishing compounds.		Carbon Fiber	No	No	No	1	Should be assessed for wind turbine blades.	No Action. The scope of materials assessed included a limited set of engineered materials: electrical steel and silicon carbide. This set of engineered materials were selected based on two factors: (1) they were found to have high potential for supply risk in the “supply chain deep dive” reports as part of “America’s Strategy to Secure the Supply Chain for a Robust Clean Energy Transition,” and (…
Cesium	Research and development.		Cerium	Yes	No	No	1	The risks associated with the overproduction of elements like cerium are overstated in the assessment.	No action: Cerium was not assessed for material criticality. Cerium is on the USGS list.
Chromium	Metallurgy.		Cobalt	Yes	Yes	Yes	6	Information on dependency on Democratic Republic of Congo and China. LFP/LFMP (lithium iron phosphate/lithium iron-manganese- phosphate) technology will reduce cobalt dependency for batteries. Most mining and processing of cobalt occurs outside the US.	No action: Cobalt is already on the USGS list. DOE may consider this input for future assessments and activities.
Cobalt	Batteries and metallurgy.		Copper	No	Yes	Yes	9	Copper score should increase based on importance to energy (more end- uses than considered in assessment) and supply risk. Copper should not be on the list because: (1) it is not on the USGS list and (2) will incentivize mining through the IRA 48C tax credit and most copper deposits are within 35 miles of Native American Reservations.	No Action. Copper is already on DOE draft list. DOE may consider this input for future assessment and activities. (1) The methodologies employed by the USGS and DOE have several distinctions. While the USGS methodology is a supply-side approach that uses historical data to determine criticality within the context of the economy and national security, the DOE methodology is forward looking— incorp…
Dysprosium	Data storage devices, lasers, and permanent magnets.		Dysprosium	Yes	Yes	Yes	1	Add dysprosium to critical materials list because of its use in magnets	No action: Dysprosium is already on the USGS list and DOE draft list.
Erbium	Fiber optics, glass colorant, lasers, and optical amplifiers.		Electrical Steel	No	Yes	Yes	1	Limitations on substitutability between non-grain oriented steels, grain oriented steels, and amorphous steel.	No action: Electrical steel is already on the DOE draft list. DOE will consider this input for future assessments and activities.
Europium	Nuclear control rods and phosphors.		Fluorine	No	Yes	Yes	2	Fluorine-based compounds are used in lithium-ion batteries.	No action: Fluorine is already on the DOE draft list.
Fluorspar	Cement, industrial chemicals, and metallurgy.		Polyviny- lidene fluoride (PVDF)	No	No	No	1	Extend analysis of fluorine to include suspension grade PVDF due to complexity of high- grade production and limited production capability and anticipated increase in demand.	No action: A limited set of engineered materials was assessed: electrical steel and silicon carbide. In practice, designation as a critical material is generally limited to an element, but does not restrict the mitigation strategies prioritized by DOE to be limited to the elemental form.
Gadolinium	Medical imaging, metallurgy, and permanent magnets.		Gallium	Yes	Yes	Yes	1	Gallium’s role in off-shore magnets was not well defined. Should be listed as critical to solar cells and power electronics.	No action: Gallium is already on the USGS list and DOE draft list.
Gallium	Integrated circuits and optical devices.		Gallium Nitride	No	No	No	2	Gallium nitride should be on list for its use.	No action: Gallium nitride was considered, but it did not meet the threshold of the screening step of DOE methodology.
Germanium	Defense and fiber optics.		Gold	No	No	No	2	Gold should be on list due to competing uses and potential source of critical materials as byproducts.	Gold is outside the scope based on the definitions of energy technologies.
Graphite	Batteries, fuel cells, and lubricants.		Graphite – natural	Yes	Yes	Yes	2	US has no domestic natural graphite mines.	No action: Graphite is already on the USGS list and DOE draft list.
Hafnium	Ceramics, nuclear control rods, and metallurgy.		Graphite – synthetic	Yes	No	No	6	Capacitors and supercapacitors are also end-uses. No data provided. Synthetic graphite has superior performance in EV batteries. Has multiple applications in nuclear, molten salt reactors. Most synthetic graphite is produced outside the US.	No action: Graphite (natural graphite and synthetic graphite) is already on the USGS list and no data were provided.
Holmium	Lasers, nuclear control rods, and permanent magnets.		Helium	No	No	No	1	Helium, antimony, tungsten, and tin should be on the list. Helium is important for advanced technology and energy technology.	No action: The scope of materials for this assessment does not include materials that are indirectly used in the manufacturing process but not contributing to the composition of the components or final products. DOE may consider this input for future assessments and activities.
Indium	Liquid crystal displays.		Iridium	Yes	Yes	Yes	2	U.S. needs to be strategic in importing iridium.	No action: Iridium is already on the USGS list and DOE draft list.
Iridium	Anode coatings for electrochemical processes and chemical catalysts.		Iron ore	No	No	No	1	Iron ore fits the description of a critical material due to its widespread applications.	Iron ore is outside the scope based on the definitions of energy technologies.
Lanthanum	Batteries, catalysts, ceramics, glass, and metallurgy.		Lanthanum	Yes	No	No	1	It is recommended that the DOE investigates the components needed for rare earth elements (REE) containing steels for carbon dioxide and hydrogen pipelines.	No action: Lanthanum was considered, but it did not meet the threshold of the screening step of DOE methodology. Lanthanum is on the USGS list.
Lithium	Batteries.		Lead	No	No	No	1	International demand for lead will begin to outpace US demand in the near term.	No action: Lead is outside the scope based on the definitions of energy technologies.
Lutetium	Cancer therapies, electronics, and medical imaging.		Lithium	Yes	Yes	Yes	5	Need more domestic lithium production facilities. Consider upgrading lithium as critical in short-term in Section 3.1.2.	No action: Lithium is already on the USGS list and DOE draft list. DOE will consider this input for future assessments and activities.
Magnesium	Metallurgy.		Manganese	Yes	No	No	2	Manganese should be on list due to lack of domestic capabilities, particularly for battery-grade manganese. Data not provided. DOE should recognize the difference between bulk mined manganese used in steel-making and high purity manganese for batteries. China controls 95% of global battery grade manganese processing.	No action: Manganese is already on the USGS list and no data were provided.
Manganese	Batteries and metallurgy.		Molybdenum	No	No	No	1	Molybdenum should be the list due to its use in high strength steels used in vehicle lightening and energy infrastructure (wind turbine supports).	No action: Molybdenum was not found to be material of concern in the DOE Wind Energy Supply Chain Deep Dive. Assessment.14 DOE may consider this input for future assessments and activities.
Neodymium	Catalysts, lasers, and permanent magnets.		Neodymium	Yes	Yes	Yes	2	Recommends DOE to investigate the components needed for REE-bearing steels needed for carbon dioxide and hydrogen pipelines. In the assessment, neodymium should be considered critical for applications in motors.	No action: Neodymium is already on the USGS list and DOE draft list. DOE may consider this input for future assessments and activities.
Nickel	Batteries and metallurgy.		Nickel	Yes	Yes	Yes	2	Nickel as a copper byproduct should be seen as a factor that reduces supply risk.	No action: Nickel is already on the DOE draft list. DOE may consider this input for future assessments and activities.
Niobium	Metallurgy.		Palladium	Yes	No	No	3	Palladium and rhodium should be on the list. Potential substitute for platinum and iridium in fuel cells and electrolyzers.	No action: Palladium is already on the USGS list. DOE may consider this input for future assessments and activities.
Palladium	Catalytic converters and catalysts.		Phosphates	No	No	No	3	Phosphates should be on the list. Phosphates are a potential precursor material for LFP batteries, and the usage competes with agricultural and food industry uses.	No action: A limited set of engineered materials was assessed: electrical steel and silicon carbide. In practice, designation as a critical material is generally limited to an element, but does not restrict the mitigation strategies prioritized by DOE to be limited to the elemental form.
Platinum	Catalytic converters and catalysts.		Phosphorus	No	No	No	1	Phosphorus is important for agriculture and production is geoconcentrated outside US. Phosphorus demand for lithium iron phosphate (LFP) batteries is expected to experience shortfall in supply. Most battery grade phosphorus has to be imported.	DOE revisited the assessment of phosphorous. DOE provides further clarification that Critical Materials Assessment considered high LFP adoption scenarios, geoconcentration of production outside the U.S., and agriculture as a competing use in the assessment of phosphorous. More details can be found in the Critical Materials Assessment report in Section 4.3.15. While phosphorous passed the initial …
Praseodymium	Aerospace alloys, batteries, ceramics, colorants, and permanent magnets.		Platinum	Yes	Yes	Yes	3	Platinum supply not a risk in short- term. Propose addition of fuel cell applications to end- use and align platinum as Tier 1. Remove electrolyzers as an end-use application and replace with “energy conservation” category.	No action: Platinum is already on the USGS list and DOE draft list. DOE may consider this input for future assessments and activities.
Rhodium	Catalytic converters, catalysts, and electrical components.		Rhodium	Yes	No	No	2	Palladium and rhodium should be on the list. Potential substitute for platinum and iridium in fuel cells and electrolyzers.	No action: Rhodium is already on the USGS list. DOE may consider this input for future assessments and activities.
Rubidium	Research and development.		Silicon	No	Yes	Yes	6	Silicon should be on the list. There are multiple uses for silicon: photovoltaic solar cells, semiconductors, silicones, metallurgical processing. China produces over 70% of silicon.	No action: Silicon is already on the DOE draft list. DOE may consider this input for future assessments and activities.
Ruthenium	Catalysts, electronic components, and computer chips.		Silicon carbide	No	Yes	Yes	1	Needed for wide band-gap semiconductors. Demand is likely to exceed supply.	No action: Silicon carbide is already on the DOE draft list. DOE may consider this input for future assessments and activities.
Samarium	Cancer treatments, nuclear, and permanent magnets.		Silicon metal	No	No	No	2	China dominates silicon metal production. Silicon metal should be analyzed as a separate material for short- and long-term scarcity.	No Action. A limited set of engineered materials was assessed: electrical steel and silicon carbide. In practice, designation as a critical material is generally limited to an element, but does not restrict the mitigation strategies prioritized by DOE to be limited to the elemental form.
Scandium	Ceramics, fuel cells, and metallurgy.		Silver	No	No	No	2	Silver should be on list due to competing uses and potential source of critical materials as byproducts.	Sliver was not found to be material of concern in the DOE Solar Photovoltaics Supply Chain Deep Dive Assessment.15 DOE may consider this input for future assessments and activities.
Tantalum	Capacitors and metallurgy.		Terbium	Yes	No	Yes	2	Terbium should be on the list— important for neodymium-iron- boron (NdFeB) magnets (equally so as dysprosium).	Terbium was screened and assessed for NdFeB magnets. Based on the assessment, DOE has determined that terbium is on the Final DOE Critical Materials List as a critical material for energy.
Tellurium	Metallurgy, solar cells, and thermoelectric devices.		Tin	Yes	No	No	1	Tin should be on the list.	No action: Tin is already on the USGS list and no substantial data or information were provided.
Terbium	Fiber optics, lasers, permanent magnets, and solid state devices.		Titanium	Yes	No	No	1	Titanium should be on the list— important for fuel cells and lightweighting.	No action: Titanium is already on the USGS list. Titanium is unlikely to pass screening due to importance for lightweighting being primarily outside of energy end-use applications. DOE may consider this input for future assessments and activities.
Thulium	Lasers and metallurgy.		Tungsten	Yes	No	No	1	Helium, antimony, tungsten, and tin should be on list.	No action: Tungsten is already on the USGS list and no substantial data or information were provided.
Tin	Metallurgy.		Uranium	No	No	No	3	Uranium should be on list due to foreign reliance. Uranium is not a fuel and doesn’t meet the EPA definition for fuel.	No action: As described above, for the purposes of the assessment, DOE has determined that uranium used in commercial nuclear power reactors is a fuel based on the plain meaning of fuel.
Titanium	Metallurgy and pigments.		Vanadium	Yes	No	No	1	Vanadium is needed for the emerging battery technology of “flow batteries”.	No action: Vanadium is already on the USGS list. DOE will consider this input for future assessments and activities.
Tungsten	Metallurgy.		Xenon	No	No	No	1	Xenon should be considered— important for manufacturing of energy tech.	No action: The scope of materials for this assessment does not include materials that are used indirectly in the manufacturing process but not contributing to the composition of the components or final products. DOE may consider this input for future assessments and activities.
Vanadium	Batteries, catalysts, and metallurgy.
Ytterbium	Catalysts, lasers, metallurgy, and scintillators.
Yttrium	Catalysts, ceramics, lasers, metallurgy, and phosphors.
Zinc	Metallurgy.
Zirconium	Metallurgy and nuclear.

## Sheet: Table 2 
Table 2 Final Materials of Interests and Comments
Material	Comments
Aluminum	Aluminum is on both USGS and DOE lists, which is essential for lightweight structural components in wind turbines and solar panel frames.
Balsa	Balsa wood is used in the cores of wind turbine blades due to its strength-to-weight ratio, primarily in offshore wind applications.
Chromium	Chromium is on USGS list, which is vital for corrosion-resistant coatings in wind turbines and solar panel frames, ensuring longevity and durability.
Cobalt	Cobalt is on both USGS and DOE lists, which is a key component in lithium-ion batteries for energy storage systems that complement renewable energy technologies.
Concrete	Concrete is crucial for the foundations of wind turbines, both land-based and offshore, providing stability in various environments.
Copper	Copper is on DOE list, which is used extensively for electrical wiring in wind turbines, solar PV systems, and batteries due to its excellent conductivity.
Dysprosium	Dysprosium is on both USGS and DOE lists, which enhances the performance of permanent magnets in wind turbine generators, especially in offshore wind farms.
Gallium	Gallium is on both USGS and DOE lists, which is used in certain solar PV technologies like CIGS (copper indium gallium selenide) for its efficiency in thin-film solar cells.
Graphite	Graphite is on both USGS and DOE lists, which serves as an anode material in lithium-ion batteries, critical for energy storage systems that support renewable generation.
Indium	Indium is on USGS list, which is a key element in thin-film solar cells like CIGS, improving efficiency in solar PV systems.
Iron	Iron is used in wind turbine towers and solar mounting structures, contributing to the overall strength and durability of these systems.
Lithium	Lithium is on both USGS and DOE lists, which is fundamental in lithium-ion batteries, which are widely used for energy storage in renewable energy systems, especially in balancing intermittent solar and wind power.
Magnesium	Magnesium is on USGS list, which is used in lightweight alloys for components in wind turbines and solar structures, improving overall system efficiency.
Manganese	Manganese is on both USGS and DOE lists, which is an essential material for cathodes in certain types of lithium-ion batteries, improving energy density and longevity.
Molybdenum	Molybdenum is on DOE list, which is used in steel alloys for wind turbines and solar structures, enhancing strength and resistance to corrosion.
Neodymium	Neodymium is on both USGS and DOE lists, which is critical for permanent magnets in wind turbine generators, particularly for direct-drive systems used in offshore wind farms.
Nickel	Nickel is on both USGS and DOE lists, which is heavily needed for lithium-ion battery cathodes, while in wind turbines it strengthens and protects critical components from corrosion, and in solar PV systems it enhances the durability of plating and interconnections.
Praseodymium	Praseodymium is on both USGS and DOE lists, which is another rare earth element used in wind turbine magnets, improving the efficiency of offshore wind turbines.
Selenium	Selenium is used in thin-film solar cells, particularly in CIGS technology, increasing solar PV efficiency and cost-effectiveness.
Silicon	Silicon is on DOE list, which is the primary material for conventional solar PV cells, making it indispensable for converting sunlight into electricity.
Steel	Steel is fundamental for the construction of wind turbine towers, solar panel mounts, and support structures for both offshore and land-based wind and solar systems.
Tellurium	Tellurium is on USGS list, which is used in CdTe (cadmium telluride) thin-film solar cells, contributing to cost-effective solar PV technology.
Terbium	Terbium is on both USGS and DOE lists, which is used in wind turbine magnets alongside dysprosium and neodymium to improve performance in high-temperature environments.
Tin	Tin is on both USGS and DOE lists, which is used in solar cells and battery components, providing a reliable material for soldering and interconnections in renewable energy systems.
Titanium	Titanium is on both USGS and DOE lists, which is used in offshore wind turbines for corrosion-resistant components exposed to harsh marine environments.
Zinc	Zinc is on USGS list, which is applied as a protective coating for steel used in wind turbine towers and solar mounting systems, extending their service life.

## Sheet: Table 3
Table 3-1 Demand Schedule at the Component Level
	LBW_Array	LBW_Foundation	LBW_Substation	LBW_Turbine_DD	LBW_Turbine_GB	OSW_Array	OSW_Substation	OSW_Substructure	OSW_Turbine_DD	OSW_Turbine_GB	SPV_Cabling	SPV_Inverter	SPV_Racking	SPV_BOS	SPV_Transformer	SPV_Module_CdTe	SPV_Module_cSi	SPV_Module_CIGS	LIB_Cases	LIB_Collector	LIB_Electrolyte	LIB_Anode	LIB_Cathode_NCA	LIB_Cathode_NMC111	LIB_Cathode_NMC811	LIB_Cathode_NMC523	LIB_Cathode_NMC622
Aluminum	2408.87	1.29252	4.08976	581.336	806.451	240.815	0	0	761.858	1056.88	0	205.891	493.238	0	0	9052.13	10607	9494	60	112.5	0	0	7.5	0	0	0	0
Balsa	0	0	0	545.786	545.786	0	0	0	1094.84	1094.84	0	0	0	0	0	0	0	0	0	0	0	0	0	0	0	0	0
Boron	0	12.3201	0.017481	0	0	0	0	0	2.05425	0.342375	0	0	0	0.632814	0.574103	0	0	0	0	0	0	0	0	0	0	0	0
Cadmium	0	0	0	0	0	0	0	0	0	0	0	0	0	0	0	63.2764	0	21	0	0	0	0	0	0	0	0	0
Carbon Fiber	0	0	0	530.395	530.395	0	0	0	825.306	825.306	0	0	0	0	0	0	0	0	0	0	0	0	0	0	0	0	0
Chromium	0	172.181	7.20032	355.694	488.847	6.40139	5.31969	71.9519	177.847	244.423	0	1.07507	110.484	0.192105	0.206255	52.636	45.8726	0	0	0	0	0	0	0	0	0	0
Cobalt	0	0.419468	0	2.44178	2.44178	0.013096	0.142582	3.17608	1.3319	1.3319	0	0.03641	0.869912	0.00848	0.009104	0.00936	0.001801	0	0	0	0	0	39.375	99.5	22.5	57.5	50.8333
Concrete	0	393744	558.698	0	0	0	0	618800	0	0	0	0	0	20224.4	18348	0	0	0	0	0	0	0	0	0	0	0	0
Copper	1181.61	6.93591	184.378	995.985	995.985	1368.35	79.9999	0	1553.45	1553.45	3288.49	573.725	27.8492	0	1651.99	31.5836	535.435	110.93	0	212.5	0	0	0	0	0	0	0
Dysprosium	0	0	0	11.5801	1.88748	0	0	0	16.3094	2.65833	0	0	0	0	0	0	0	0	0	0	0	0	0	0	0	0	0
Gallium	0	0.007875	0	0	0.044819	0	0	0.038034	0.01592	0	0	0.000436	0.011999	0	0	0	0	26	0	0	0	0	0	0	0	0	0
Graphite	0	0	0	4.60056	4.60056	0	0	0	6.39381	6.39381	0	0	0.847475	0	0	0	0	0	0	0	0	230.043	0	0	0	0	0
Indium	0	0	0	0	0	0	0	0	0	0	0	0	0	0	0	0	0	25	0	0	0	0	0	0	0	0	0
Iron	0	0	2.88666	8443.82	8443.82	0	0	0	8977.07	8977.07	0	0.112389	0	0	0	38.0771	43.7492	40.9131	0	0	0	0	0	0	0	0	0
Lithium	0	0.002745	0	0	0.905653	0	0	0	0	1.26567	0	0	0.952503	0	0	0	0	0	0	0	7.5	0	34.2857	39	27.5	35	32.5
Magnesium	0	0	0	0	0	0	0	0	0	0	0	0	0	0	0	286.13	328.534	0	0	0	0	0	0	0	0	0	0
Manganese	0	374.295	13.9292	1977.47	1977.47	11.0797	134.933	3697.38	1057.35	1057.35	0	42.4282	949.618	9.87166	10.5988	50.2254	57.6356	0	0	0	0	0	0	91.875	22.5	87.5	50
Molybdenum	0	0	0	92.15	97.7667	0	0	0	92.1575	97.7717	0	0.011809	0	0	0	2.49776	2.27586	1	0	0	0	0	0	0	0	0	0
Neodymium	0	0	0	198.912	39.6637	0	0	0	103.539	20.6461	0	0	0	0	0	0	0	0	0	0	0	0	0	0	0	0	0
Nickel	0	391.194	9.101	1474.43	2121.05	12.1804	100.639	2772.03	862.416	1240.64	0	31.7819	773.142	7.40106	7.94622	8.65858	0	0	0	0	0	0	198.571	98.125	187.5	147.5	157.5
Praseodymium	0	0.101438	0.002699	3.46382	0.532896	0	0.036082	1.00184	43.1792	6.64296	0	0	0.257283	0.0026745	0.002872	0.002059	0.001913	0	0	0	0	0	0	0	0	0	0
Selenium	0	0	0	0	0	0	0	0	0	0	0	0	0	0	0	0	0	54.7464	0	0	0	0	0	0	0	0	0
Silicon	0	0	0	0	0	0	0	0	0	0	0	0.004294	0	0	0	38.1517	2941.8	0	0	0	0	0	0	0	0	0	0
Silver	0	0	0	0	0	0	0	0	0.0133393	0.0133393	0	0.00181672	0	0	0	0	16.8981	0	0	0	0	0	0	0	0	0	0
Steel	0	20622	997.759	105089	109990	609.507	7256	196054	57938.1	60639.9	0	2246.87	25388.2	523.447	562.004	62.7093	0	0	8.5693	0	0	0	0	0	0	0	0
Tellurium	0	0	0	0	0	0	0	0	0	0	0	0	0	0	0	63.2764	0	0	0	0	0	0	0	0	0	0	0
Terbium	0	0	0	7.63611	0	0	0	0	0.373509	0.0489123	0	0	0	0	0	0	0	0	0	0	0	0	0	0	0	0	0
Tin	0	0	0	0	0	0	0	0.25487	0.278611	0.20009	0	0.053715	0.0670635	0	0	2.46635	67.4905	0	0	0	0	0	0	0	0	0	0
Titanium	0	9.62408	0.281603	0	50.7352	0.310056	3.41674	94.4981	26.6481	26.6481	0	1.08419	24.3018	0.252301	0.270886	0.155024	0.153742	0	0	0	0	0	0	0	0	0	0
Zinc	0.088863	3.49852	0.222611	33.1175	33.1175	11.1556	1.13014	30.5844	9.63347	9.63347	0	0.424665	1420.53	11.7621	0.087673	19.6501	22.4736	26	0	0	0	0	0	0	0	0	0
Table 3-2 Contribution of Components to the Final Product
	LBW_DD	LBW_GB	OSW_DD	OSW_GB	SPV_CdTe	SPV_cSi	SPV_CIGS	LIB_NCA	LIB_NMC111	LIB_NMC811	LIB_NMC523	LIB_NMC622
LBW_Array	1	1	0	0	0	0	0	0	0	0	0	0
LBW_Foundation	1	1	0	0	0	0	0	0	0	0	0	0
LBW_Substation	1	1	0	0	0	0	0	0	0	0	0	0
LBW_Turbine_DD	1	0	0	0	0	0	0	0	0	0	0	0
LBW_Turbine_GB	0	1	0	0	0	0	0	0	0	0	0	0
OSW_Array	0	0	1	1	0	0	0	0	0	0	0	0
OSW_Substation	0	0	1	1	0	0	0	0	0	0	0	0
OSW_Substructure	0	0	1	1	0	0	0	0	0	0	0	0
OSW_Turbine_DD	0	0	1	0	0	0	0	0	0	0	0	0
OSW_Turbine_GB	0	0	0	1	0	0	0	0	0	0	0	0
SPV_Cabling	0	0	0	0	1	1	1	0	0	0	0	0
SPV_Inverter	0	0	0	0	1	1	1	0	0	0	0	0
SPV_Racking	0	0	0	0	1	1	1	0	0	0	0	0
SPV_BOS	0	0	0	0	1	1	1	0	0	0	0	0
SPV_Transformer	0	0	0	0	1	1	1	0	0	0	0	0
SPV_Module_CdTe	0	0	0	0	1	0	0	0	0	0	0	0
SPV_Module_cSi	0	0	0	0	0	1	0	0	0	0	0	0
SPV_Module_CIGS	0	0	0	0	0	0	1	0	0	0	0	0
LIB_Cases	0	0	0	0	0	0	0	1	1	1	1	1
LIB_Collector	0	0	0	0	0	0	0	1	1	1	1	1
LIB_Electrolyte	0	0	0	0	0	0	0	1	1	1	1	1
LIB_Anode	0	0	0	0	0	0	0	1	1	1	1	1
LIB_Cathode_NCA	0	0	0	0	0	0	0	1	0	0	0	0
LIB_Cathode_NMC111	0	0	0	0	0	0	0	0	1	0	0	0
LIB_Cathode_NMC811	0	0	0	0	0	0	0	0	0	1	0	0
LIB_Cathode_NMC523	0	0	0	0	0	0	0	0	0	0	1	0
LIB_Cathode_NMC622	0	0	0	0	0	0	0	0	0	0	0	1

## Sheet: Table 4
Table 4 List of Commodities Recorded by UN Comtrade Relevant to the Study
Material	Code Type	Code	Commodity
Aluminum	SITC	684	Aluminium
Balsa	HS	440722	Wood sawn or chipped lengthwise, sliced or peeled, of tropical wood specified in Subheading Note 1 to this Chapter, whether or not planed, sanded, or end-jointed, of a thickness exceeding 6 mm.
Boron	SITC	52384	Borates; Peroxoborates (Perborates)
Cadmium	SITC	68982	Cadmium, unwrought; cadmium waste and scrap; cadmium powders
Carbon Fiber	HS	6815	Articles of stone or other mineral substances (including carbon fibers, articles of carbon fibers, and articles of peat), n.e.s.o.i.
Chromium	SITC	67153	Ferrochromium
Cobalt	SITC	68981	Cobalt mattes and other intermediate products of cobalt metallurgy; cobalt, unwrought; cobalt waste and scrap; cobalt powders
Copper	SITC	682	Copper
Dysprosium	SITC	5259	Stable isotopes and compounds; rare-earth metal compounds or mixtures of yttrium or scandium
Gallium	HS	811292	Gallium, germanium, hafnium, indium, niobium (columbium), rhenium, and vanadium; articles thereof, unwrought, including waste and scrap, powders
Graphite	SITC	27822	Graphite, natural
Indium	HS	811292	Gallium, germanium, hafnium, indium, niobium (columbium), rhenium, and vanadium; articles thereof, unwrought, including waste and scrap, powders
Lithium	HS	283691	Carbonates; lithium carbonate
Magnesium	HS	2519	Natural magnesium carbonate; fused magnesia; dead-burned (sintered) magnesia; other magnesium oxide, whether or not pure
Manganese	SITC	6714	Ferromanganese
Molybdenum	SITC	28782	Molybdenum ores and concentrates, other than roasted
Neodymium	SITC	5259	Stable isotopes and compounds; rare-earth metal compounds or mixtures of yttrium or scandium
Nickel	SITC	683	Nickel
Praseodymium	SITC	5259	Stable isotopes and compounds; rare-earth metal compounds or mixtures of yttrium or scandium
Selenium	HS	280490	Selenium
Silicon	SITC	52223	Silicon
Silver	HS	7106	Silver (including silver plated with gold or platinum), unwrought or in semi-manufactured forms, or in powder form
Tellurium	HS	280450	Boron; tellurium
Terbium	SITC	5259	Stable isotopes and compounds; rare-earth metal compounds or mixtures of yttrium or scandium
Tin	SITC	687	Tin
Titanium	SITC	68983	Titanium, unwrought; titanium waste and scrap; titanium powders
Zinc	SITC	686	Zinc

## Sheet: Table 5
Table 5-1 Historical Reserves of Selected Materials for the United States
Source	https://www.usgs.gov/media/files/aluminum-historical-statistics-data-series-140		https://www.usgs.gov/media/files/boron-historical-statistics-data-series-140	https://www.usgs.gov/media/files/cadmium-historical-statistics-data-series-140 2013: https://www.usgs.gov/centers/national-minerals-information-center/cadmium-statistics-and-information		https://www.usgs.gov/media/files/chromium-historical-statistics-data-series-140	https://www.usgs.gov/media/files/cobalt-historical-statistics-data-series-140	https://www.usgs.gov/media/files/copper-historical-statistics-data-series-140		https://www.usgs.gov/media/files/gallium-historical-statistics-data-series-140	https://www.usgs.gov/media/files/gold-historical-statistics-data-series-140	https://www.mbmg.mtech.edu/pdf-publications/fs13.pdf	https://www.usgs.gov/media/files/indium-historical-statistics-data-series-140 2007, 2013: https://www.nrel.gov/docs/fy16osti/62409.pdf	https://www.usgs.gov/media/files/lithium-historical-statistics-data-series-140	https://www.usgs.gov/media/files/magnesium-metal-historical-statistics-data-series-140	https://www.usgs.gov/media/files/manganese-historical-statistics-data-series-140	https://www.usgs.gov/media/files/molybdenum-historical-statistics-data-series-140	https://www.usgs.gov/media/files/nickel-historical-statistics-data-series-140		https://www.usgs.gov/media/files/rare-earths-historical-statistics-data-series-140	https://www.usgs.gov/media/files/selenium-historical-statistics-data-series-140	https://www.usgs.gov/media/files/silicon-historical-statistics-data-series-140	https://www.usgs.gov/media/files/silver-historical-statistics-data-series-140	https://www.usgs.gov/media/files/tellurium-historical-statistics-data-series-140		https://www.usgs.gov/media/files/tin-historical-statistics-data-series-140	https://www.usgs.gov/media/files/titanium-metal-historical-statistics-data-series-140	https://www.usgs.gov/media/files/vanadium-historical-statistics-data-series-140	https://www.usgs.gov/media/files/zinc-historical-statistics-data-series-140
unit	metric tons			metric tons cadmium content		metric tons chromium	metric tons cobalt	metric tons		metric tons gallium content		kilotonnes total resources (potential reserves)	tonnes indium metal			metric tons manganese content	metric tons	metric tons				metric tons silicon content	metric tons			metric tons tin content		metric tons	metric tons
Year	aluminum	balsa	boron	Cadmium	carbon fiber	chromium	cobalt	copper	dysprosium	Gallium	gold	Graphite	Indium	lithium	magnesium	Manganese	molybdenum	nickel	praseodymium	REE	selenium	Silicon	silver	tellerium	terbium	Tin	titanium	vanadium	zinc
2000	1550000	-	-	1200	-	838600	1120	1938000	-	0.955	-	-	-	-	W	1380000	11400	26100	-	-	W	52400	3600	-	-	70100	31310	303	215000
2001	1330000	-	-	1750	-	832700	1330	1946000	-	0.578	-	-	-	-	W	40600	10700	24200	-	-	W	40600	3490	-	-	63920	24940	251	195000
2002	1370000	-	-	1360	-	651390	1140	1648000	-	0.824	-	-	-	-	W	1220000	9970	17000	-	-	W	25100	3510	-	-	54300	24900	233	181000
2003	1610000	-	-	1430	-	569870	1010	1457000	-	1.2	-	-	-	-	W	1150000	7180	19000	-	-	W	22500	3680	-	-	43560	14600	252	168000
2004	1590000	-	-	1170	-	473900	1210	1451000	-	1.71	-	-	-	-	W	920000	7480	17900	-	-	W	22300	4220	-	-	34080	10170	336	135000
2005	1640000	-	-	184	-	383520	1190	1393000	-	1.8	-	-	-	-	W	873000	9420	19100	-	-	W	18800	3970	-	-	24970	4330	371	116000
2006	1640000	-	-	74	-	281620	1180	1361000	-	1.89	-	-	-	-	W	697000	6990	19900	-	-	W	15900	3540	-	-	16090	8240	330	75300
2007	1870000	-	-	107	-	124940	1310	1432000	-	6.01	-	-	280	-	W	490000	7640	19800	-	-	W	13800	4190	-	-	12950	7820	324	62700
2008	2510000	-	-	132	-	112290	1160	1379000	-	3.82	-	-	-	-	W	516000	6990	21700	-	-	W	21300	4130	-	-	12580	14200	335	65600
2009	3140000	-	-	27	-	135820	780	1248000	-	4.1	-	-	-	-	W	408000	1540	19900	-	-	W	13900	3650	-	-	11090	15300	295	92300
2010	3240000	-	-	102	-	122300	903	1203000	-	4.97	-	-	-	-	W	407000	1630	23100	-	-	W	20000	3380	-	-	10430	10500	248	57900
2011	3420000	-	-	W	-	118770	1080	1145000	-	6.85	-	-	-	-	W	509000	1810	24800	-	-	W	29800	3800	-	-	10300	10800	193	79200
2012	3260000	-	-	W	-	114580	1030	1126000	-	6.22	-	-	-	-	W	477000	1770	23200	-	-	W	34700	4720	-	-	10930	18100	219	81500
2013	3080000	-	-	32000	-	104250	1110	1159000	-	5.47	-	-	200	-	W	465000	1820	22500	-	-	W	25000	5460	-	-	10540	25200	166	80900
2014	2470000	-	-	W	-	89520	1420	1223000	-	3.98	-	-	-	-	W	432000	2010	24500	-	-	W	27100	5730	-	-	10990	22900	140	95300
2015	1860000	-	-	W	-	79540	1240	1256000	-	3.28	-	-	-	-	W	491000	1880	23400	-	-	W	33500	5000	-	-	11131	25000	210	94000
2016	1760000	-	-	W	-	75300	1160	1329000	-	2.72	-	-	-	-	W	450000	1910	20300	-	-	W	26500	5710	-	-	10411	25100	207	86700
2017	1720000	-	-	W	-	64760	1180	1186000	-	2.84	-	-	-	-	W	409000	2010	18400	-	-	W	26300	7570	-	-	10700	13200	227	121000
2018	1760000	-	-	W	-	59760	1190	1219000	-	2.92	-	-	-	-	W	434000	1940	18600	-	-	W	19100	9150	-	-	14140	10700	250	126000
2019	1720000	-	-	W	-	55970	1200	-	-	2.85	-	-	-	-	W	444000	1980	-	-	-	W	14800	9860	-	-	14325	W	257	124000
2020	1730000	-	-	W	-	52020	-	-	-	2.92	-	-	-	-	W	373000	2010	-	-	-	-	12200	12300	-	-	269	-	269	127000
2021	1940000	-	-	W	-	45200	-	-	-	2.81	-	-	-	-	W	400000	2040	-	-	-	-	10700	11100	-	-	271	-	271	127000
2022	-	-	-	-	-	5080	-	-	-	-	-	-	-	-	-	213000	2050	-	-	-	-	16700	-	-	-	248	-	248	-
2023	-	-	-	-	-	-	-	-	-	-	-	11603	-	-	-	-	-	-	-	-	-	-	-	-	-	-	-	-	-
Table 5-2 Aggregated Mineral Production Over the Last 30-Year Supercycle by Continent
Year	Africa	Asia	Europe	Latin America	North America	Oceania
1984	491277838	3621311795	2343687167	562918109	2059724620	254010287
1985	553611145	3739473268	2434569522	566395211	2071063053	280261932
1986	560389452	3967356364	2471557140	573958486	2027980977	292796449
1987	558162223	4077926753	2485274829	563610024	2072705805	322233565
1988	578429601	4279286059	2472914295	591044007	2141270229	304067006
1989	611700950	4532524060	2424486765	613513369	2164117026	332116920
1990	629191234	4572698187	2260384385	646514806	2203364391	347898842
1991	645653677	4530147887	2123225949	663144692	2184274275	362385522
1992	631548263	4548105428	1988575741	670906236	2181844083	374707983
1993	641442391	4612255822	1875144144	686932025	2143538949	386115067
1994	652593419	4588370886	1826771587	720458025	2262153843	392630850
1995	686972850	4815000261	1833630402	746470946	2273227243	415408333
1996	680883877	4873624539	1832396599	777566260	2316670697	429772081
1997	713277901	4962281225	1828156669	814112340	2351638894	462884590
1998	720075978	4960128948	1746953317	887179897	2356329541	477032547
1999	732165377	4923054418	1720903646	879227670	2327927155	484371047
2000	765733161	5044347347	1755831314	908619421	2324941284	515396283
2001	773456477	5163028483	1753228844	916247148	2357596851	542716215
2002	781715961	5348347987	1777146371	922152856	2322570961	559952299
2003	833951331	5963461574	1778426870	955340532	2283577245	573865355
2004	890333467	6530655135	1788447564	1033685411	2355162356	597542934
2005	944557106	7061935445	1749860998	1068298139	2343744813	629027925
2006	957844493	7546667459	1728736889	1105968273	2381080452	643587222
2007	975719824	7948183733	1717654533	1131860494	2371567898	675817593
2008	996725540	8282659499	1700341760	1122207082	2403886981	710116169
2009	963712121	8317468202	1606072227	1065789961	2295422815	730579686
2010	1009671549	8914324096	1621734751	1128727828	2355466902	801849138
2011	929029245	9523347750	1638509802	1170779425	2432757654	817953467
2012	995271428	9730258928	1618083805	1184530000	2440151470	866165112
2013	965281758	9851218051	1574013822	1171457844	2494749692	960861697
2014	947167213	9795198362	1508795906	1203104654	2644867340	1067681955
2015	940212339	9812827133	1486909238	1196135873	2632627728	1138430125
2016	915022413	9630999494	1448934784	1160125574	2443884926	1168078850
2017	966126989	9894991661	1460318660	1152679450	2576086302	1196592680
2018	978354698	10342563059	1419954538	1101842787	2766502633	1210303364
2019	987210160	10590070293	1280221120	1034229997	2864743897	1259553182
2020	889634740	10297576978	1176169074	951028059	2646430963	1249138171
Table 5-3 Historical Global Price of Metal Index
Year	Price Index
1992	47.879
1993	40.4516
1994	47.1845
1995	57.5175
1996	50.9391
1997	50.906
1998	41.035
1999	41.3895
2000	47.9324
2001	41.7942
2002	41.3298
2003	48.3829
2004	67.2307
2005	82.8408
2006	130.095
2007	160.665
2008	144.284
2009	121.437
2010	185.838
2011	209.357
2012	172.098
2013	165.419
2014	145.273
2015	105.604
2016	100
2017	122.189
2018	130.287
2019	135.32
2020	140.01
2021	205.413
2022	193.895
2023	188.548

## Sheet: Table 6
Table 6-1 ATB Selected Products with Cost Analysis Assumptions
echnology	Technical Specifications	Energy Resource Specifications
Land-based Wind	- Turbine rating (MW): 6	- Avg. Wind Speed (m/s): 8.45
	- Rotor diameter (m): 170	- Min. Wind Speed (m/s): 8.35
	- Specific power (W/m²): 264	- Max. Wind Speed (m/s): 8.57
	- Hub height (m): 115	- Wind Speed Range (m/s): 0.22
	- Wind plant rating (MW): 200	- Percentile Range: 4%–8%
	- Number of turbines: 34
Offshore Wind	- Hub height (m): 137	- Min. Site Mean Wind Speed (m/s): 8.79
	- Rotor diameter (m): 216	- Max. Site Mean Wind Speed (m/s): 10.45
	- Specific power (W/m²): 327	- Average Site Mean Wind Speed (m/s): 9.47
	- Turbine rating (MW): 12	- Range of Site Mean Wind Speeds (m/s): 1.66
	- Wind plant rating (MW): 1,008	- Percentile Range of Total Resource Potential (%): 4%–8%
Solar PV	Utility-scale PV systems in the 2024 ATB represent 100-MWDC (74.6-MWAC) one-axis tracking systems with performance and pricing characteristics in line with bifacial modules and a DC-to-AC ratio, or inverter loading ratio (ILR), of 1.34 for the Base Year and future years.	- GHI Bin (kWh/m²/day): 4.75–5
		- Mean Alternating Current (AC) Capacity Factor: 28.3%
		- Area (km²): 469,396
Battery Storage	- Size: 60-MW 4-hour battery	-
Table 6-2 Capital Costs for Clean Energy Products Through 2050
Year	Land-based Wind	Offshore Wind	Solar PV	Battery Storage
2023	1447	3527	1331	1716
2024	1292	3193	1290	1639
2025	1268	3117	1248	1436
2026	1245	3053	1206	1390
2027	1221	2997	1164	1343
2028	1197	2949	1122	1297
2029	1174	2905	1080	1250
2030	1150	2865	1038	1204
2031	1139	2829	997	1185
2032	1127	2796	955	1167
2033	1116	2765	913	1148
2034	1105	2736	871	1130
2035	1093	2709	829	1111
2036	1082	2684	816	1092
2037	1071	2661	803	1074
2038	1059	2638	790	1055
2039	1048	2617	777	1037
2040	1037	2596	764	1018
2041	1025	2577	751	1000
2042	1014	2559	737	981
2043	1003	2541	724	963
2044	991	2524	711	944
2045	980	2508	698	925
2046	969	2492	685	907
2047	958	2477	672	888
2048	946	2462	659	870
2049	935	2448	646	851
2050	924	2435	632	833

## Sheet: Table 7
Table 7 Annual Installation Limits and Cumulative Targets Through 2050
Technology	Upper_installation	Lower_installation	Goal	Year
Land-based Wind	15	7	0	2023
Offshore Wind	2	0	0	2023
Solar PV	30	30	0	2023
Lithium-ion Battery	30	1	0	2023
Land-based Wind	15	7	0	2024
Offshore Wind	3.1	0	0	2024
Solar PV	30	30	0	2024
Lithium-ion Battery	30	1	0	2024
Land-based Wind	15	7	165.01	2025
Offshore Wind	5.3	0	0	2025
Solar PV	30	30	225	2025
Lithium-ion Battery	30	1	0	2025
Land-based Wind	15	7	0	2026
Offshore Wind	5.3	0	0	2026
Solar PV	60	60	0	2026
Lithium-ion Battery	30	1	0	2026
Land-based Wind	15	7	0	2027
Offshore Wind	5.3	0	0	2027
Solar PV	60	60	0	2027
Lithium-ion Battery	30	1	0	2027
Land-based Wind	15	7	0	2028
Offshore Wind	5.3	0	0	2028
Solar PV	60	60	0	2028
Lithium-ion Battery	30	1	0	2028
Land-based Wind	15	7	0	2029
Offshore Wind	5.3	0	0	2029
Solar PV	60	60	0	2029
Lithium-ion Battery	30	1	0	2029
Land-based Wind	15	7	230.88	2030
Offshore Wind	5.3	0	30	2030
Solar PV	60	60	550	2030
Lithium-ion Battery	30	1	16.94	2030
Land-based Wind	15	7	0	2031
Offshore Wind	10	0	0	2031
Solar PV	77	60	0	2031
Lithium-ion Battery	30	7	0	2031
Land-based Wind	15	7	0	2032
Offshore Wind	10	0	0	2032
Solar PV	77	60	0	2032
Lithium-ion Battery	30	7	32.44	2032
Land-based Wind	15	7	0	2033
Offshore Wind	10	0	0	2033
Solar PV	77	60	0	2033
Lithium-ion Battery	30	7	0	2033
Land-based Wind	15	7	0	2034
Offshore Wind	10	0	0	2034
Solar PV	77	60	0	2034
Lithium-ion Battery	30	7	44.06	2034
Land-based Wind	15	7	275.2	2035
Offshore Wind	10	0	0	2035
Solar PV	77	60	1000	2035
Lithium-ion Battery	30	7	0	2035
Land-based Wind	15	7	0	2036
Offshore Wind	10	0	0	2036
Solar PV	84	30	0	2036
Lithium-ion Battery	30	7	60.52	2036
Land-based Wind	15	7	0	2037
Offshore Wind	10	0	0	2037
Solar PV	84	30	0	2037
Lithium-ion Battery	30	7	0	2037
Land-based Wind	15	7	0	2038
Offshore Wind	10	0	0	2038
Solar PV	84	30	0	2038
Lithium-ion Battery	30	7	79.02	2038
Land-based Wind	15	7	0	2039
Offshore Wind	10	0	0	2039
Solar PV	84	30	0	2039
Lithium-ion Battery	30	7	0	2039
Land-based Wind	15	7	372.93	2040
Offshore Wind	10	0	0	2040
Solar PV	84	30	0	2040
Lithium-ion Battery	30	7	96.28	2040
Land-based Wind	15	7	0	2041
Offshore Wind	10	0	0	2041
Solar PV	117	30	0	2041
Lithium-ion Battery	30	7	0	2041
Land-based Wind	15	7	0	2042
Offshore Wind	10	0	0	2042
Solar PV	117	30	0	2042
Lithium-ion Battery	30	7	115.73	2042
Land-based Wind	15	7	0	2043
Offshore Wind	10	0	0	2043
Solar PV	117	30	0	2043
Lithium-ion Battery	30	7	0	2043
Land-based Wind	15	7	0	2044
Offshore Wind	10	0	0	2044
Solar PV	117	30	0	2044
Lithium-ion Battery	30	7	137.37	2044
Land-based Wind	15	7	467.8	2045
Offshore Wind	10	0	0	2045
Solar PV	117	30	0	2045
Lithium-ion Battery	30	7	0	2045
Land-based Wind	15	7	0	2046
Offshore Wind	10	0	0	2046
Solar PV	177	30	0	2046
Lithium-ion Battery	30	7	155.11	2046
Land-based Wind	15	7	0	2047
Offshore Wind	10	0	0	2047
Solar PV	177	30	0	2047
Lithium-ion Battery	30	7	0	2047
Land-based Wind	15	7	0	2048
Offshore Wind	10	0	0	2048
Solar PV	177	30	0	2048
Lithium-ion Battery	30	7	173.63	2048
Land-based Wind	15	7	0	2049
Offshore Wind	10	0	0	2049
Solar PV	177	30	0	2049
Lithium-ion Battery	30	7	0	2049
Land-based Wind	15	7	528	2050
Offshore Wind	10	0	110	2050
Solar PV	177	30	1600	2050
Lithium-ion Battery	30	7	189.8	2050
